# Supplementary material for: Self-templated synthesis of hierarchical mesoporous SnO2 nanosheets for selective CO2 reduction
Source: Royal Society of Chemistry journal article supplement (doi:10.1039/c8ta10959a), 2018-12-12
Supplement: c8ta10959a1.pdf [file c8ta10959a1.pdf]

## **Self-Templated Synthesis of Hierarchical Mesoporous SnO<sub>2</sub> Nanosheets for Selective CO<sub>2</sub> Reduction**

Na Han, Yeyun Wang, Jun Deng, Junhua Zhou, Yunling Wu, Hui Yang, Pan Ding and

Yanguang Li\*

Institute of Functional Nano & Soft Materials (FUNSOM), Jiangsu Key Laboratory for  
Carbon-Based Functional Materials and Devices, Soochow University, Suzhou 215123, China.

Correspondence to: [yanguang@suda.edu.cn](mailto:yanguang@suda.edu.cn)

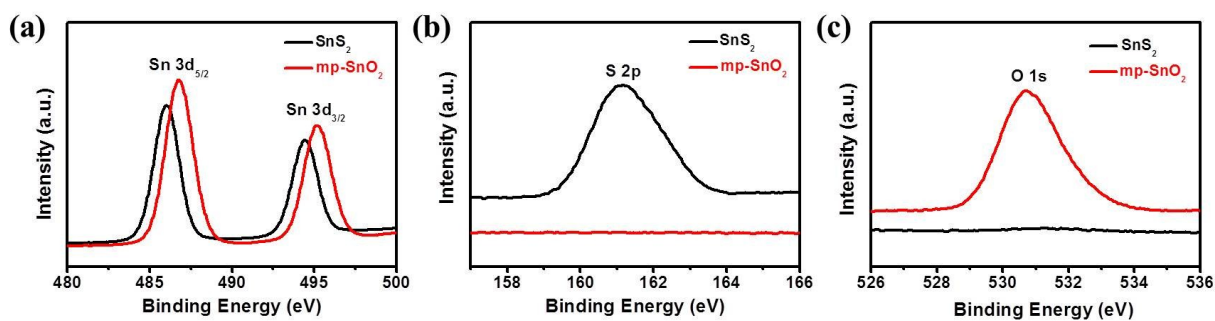

**Fig. S1** (a) Sn 3d, (b) S 2p and (c) O 1s XPS spectra of SnS<sub>2</sub> and mp-SnO<sub>2</sub>.

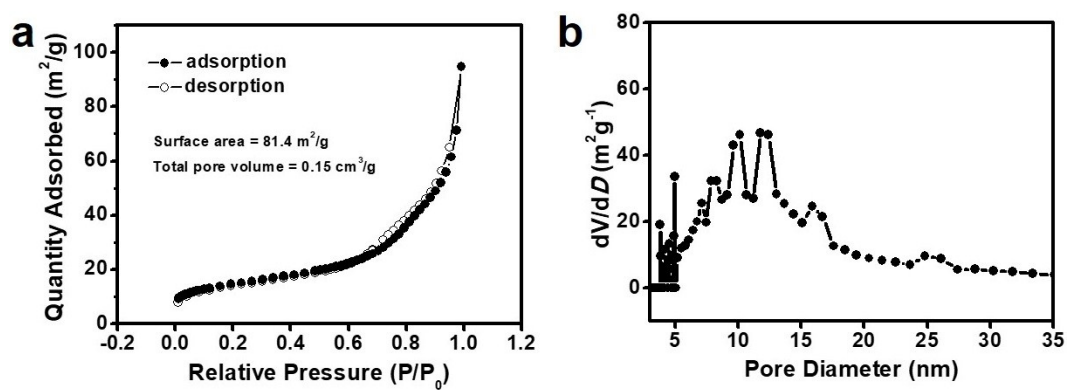

**Fig. S2** (a) N<sub>2</sub> adsorption–desorption isotherm and (b) corresponding pore size distribution curve of mp-SnO<sub>2</sub>.

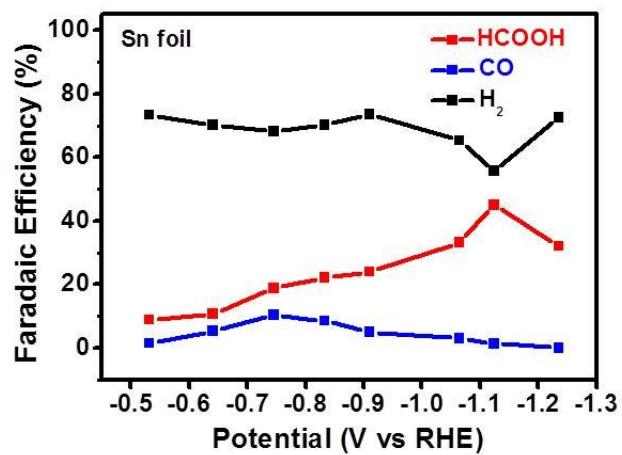

**Fig. S3** Potential-dependent Faradaic efficiencies of formate, CO or H<sub>2</sub> on commercial Sn foil in CO<sub>2</sub>-saturated 0.5 M NaHCO<sub>3</sub>.

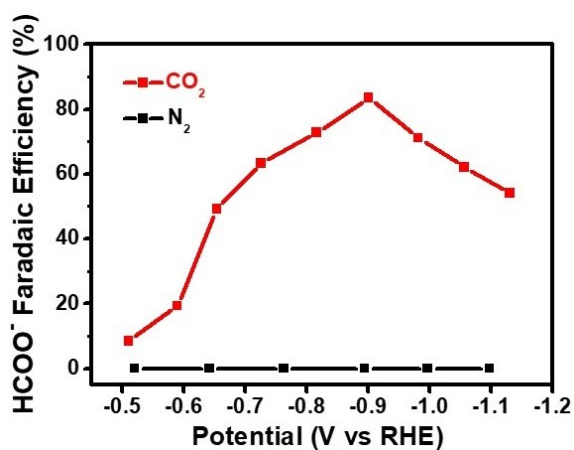

**Fig. S4** Formate partial current density on mp-SnO<sub>2</sub> in CO<sub>2</sub>- or N<sub>2</sub>-saturated 0.5 M NaHCO<sub>3</sub>.

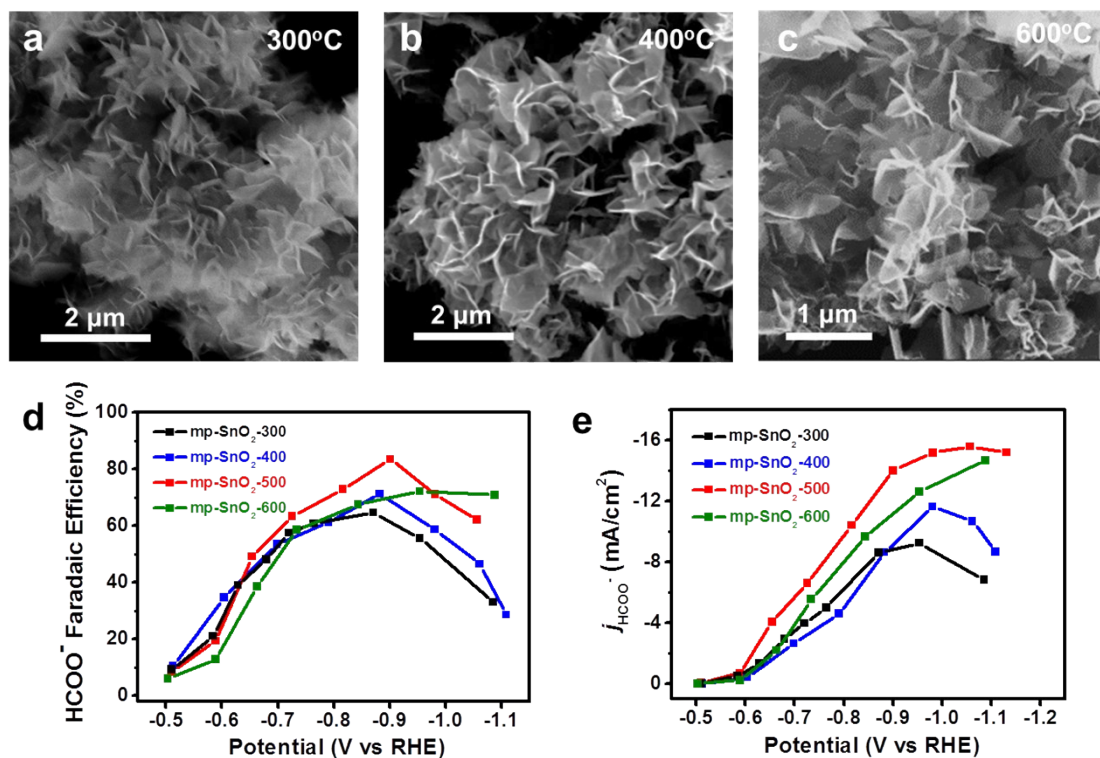

**Fig. S5** (a-c) SEM images, (d) formate Faradaic efficiency and (e) formate partial current density of SnO<sub>2</sub> samples calcined at temperatures as indicated.

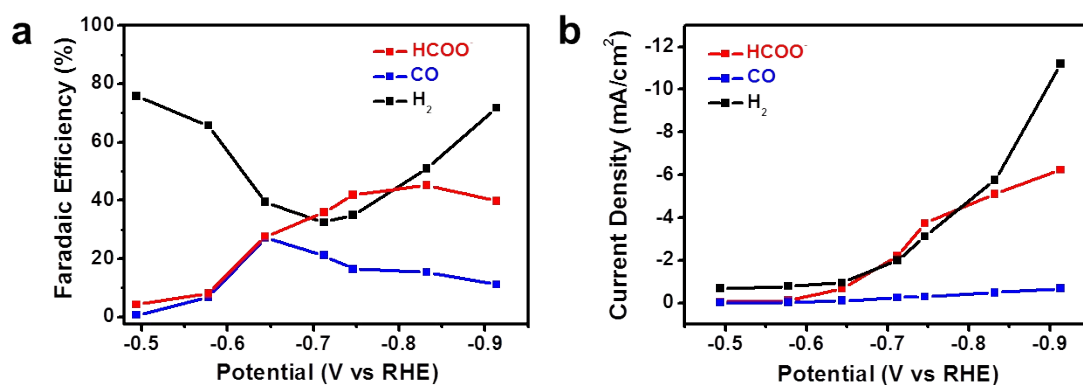

**Fig. S6** (a) Potential-dependent Faradaic efficiencies and (b) partial current densities for CO, H<sub>2</sub> and HCOO<sup>-</sup> on as-prepared SnS<sub>2</sub>.
